# Supplementary material for: The Ighmbp2 helicase structure reveals the molecular basis for disease-causing mutations in DMSA1
Source: PubMed Central journal article supplement — Nucleic Acids Res. 2012 Sep 8;40(21):11009–22. doi: 10.1093/nar/gks792 (PMC3505976; doi:10.1093/nar/gks792), 2012-09-08

## SUPPORTING INFORMATION

**Supplementary Figure 1.** The electron density map of the bound ssRNA. Stereo diagram of 2.85Å simulated annealing omit map (blue) contoured at 1.0  $\sigma$  showing the bound poly(A) of molecule A in the hIghmbp2hd-RNA structure. For simplicity, only the last five nucleotides of the 9-mer ssRNA are shown in stick models.

**Supplementary Figure 2.** Sequence alignment of helicase domains of Upf1 and Ighmbp2. The amino acids sequences of human (*H.s.*), mouse (*M.m.*) and hamster (*M.a.*) Ighmbp2 were aligned with those of human and *Saccharomyces cerevisiae* (*S.c.*) Upf1. Residues of human Ighmbp2 associated with disease-causing missense mutations in SMARD1 are marked with “●”.

# Supplementary Figure 1

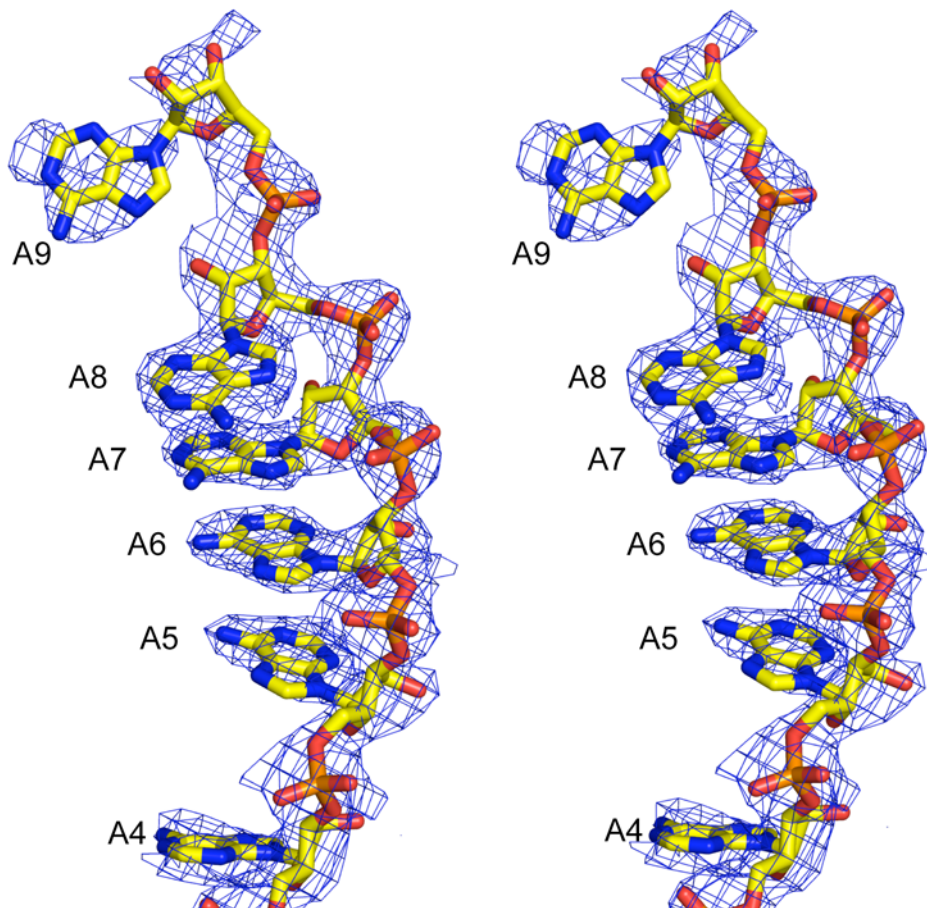

## Supplementary Figure 2

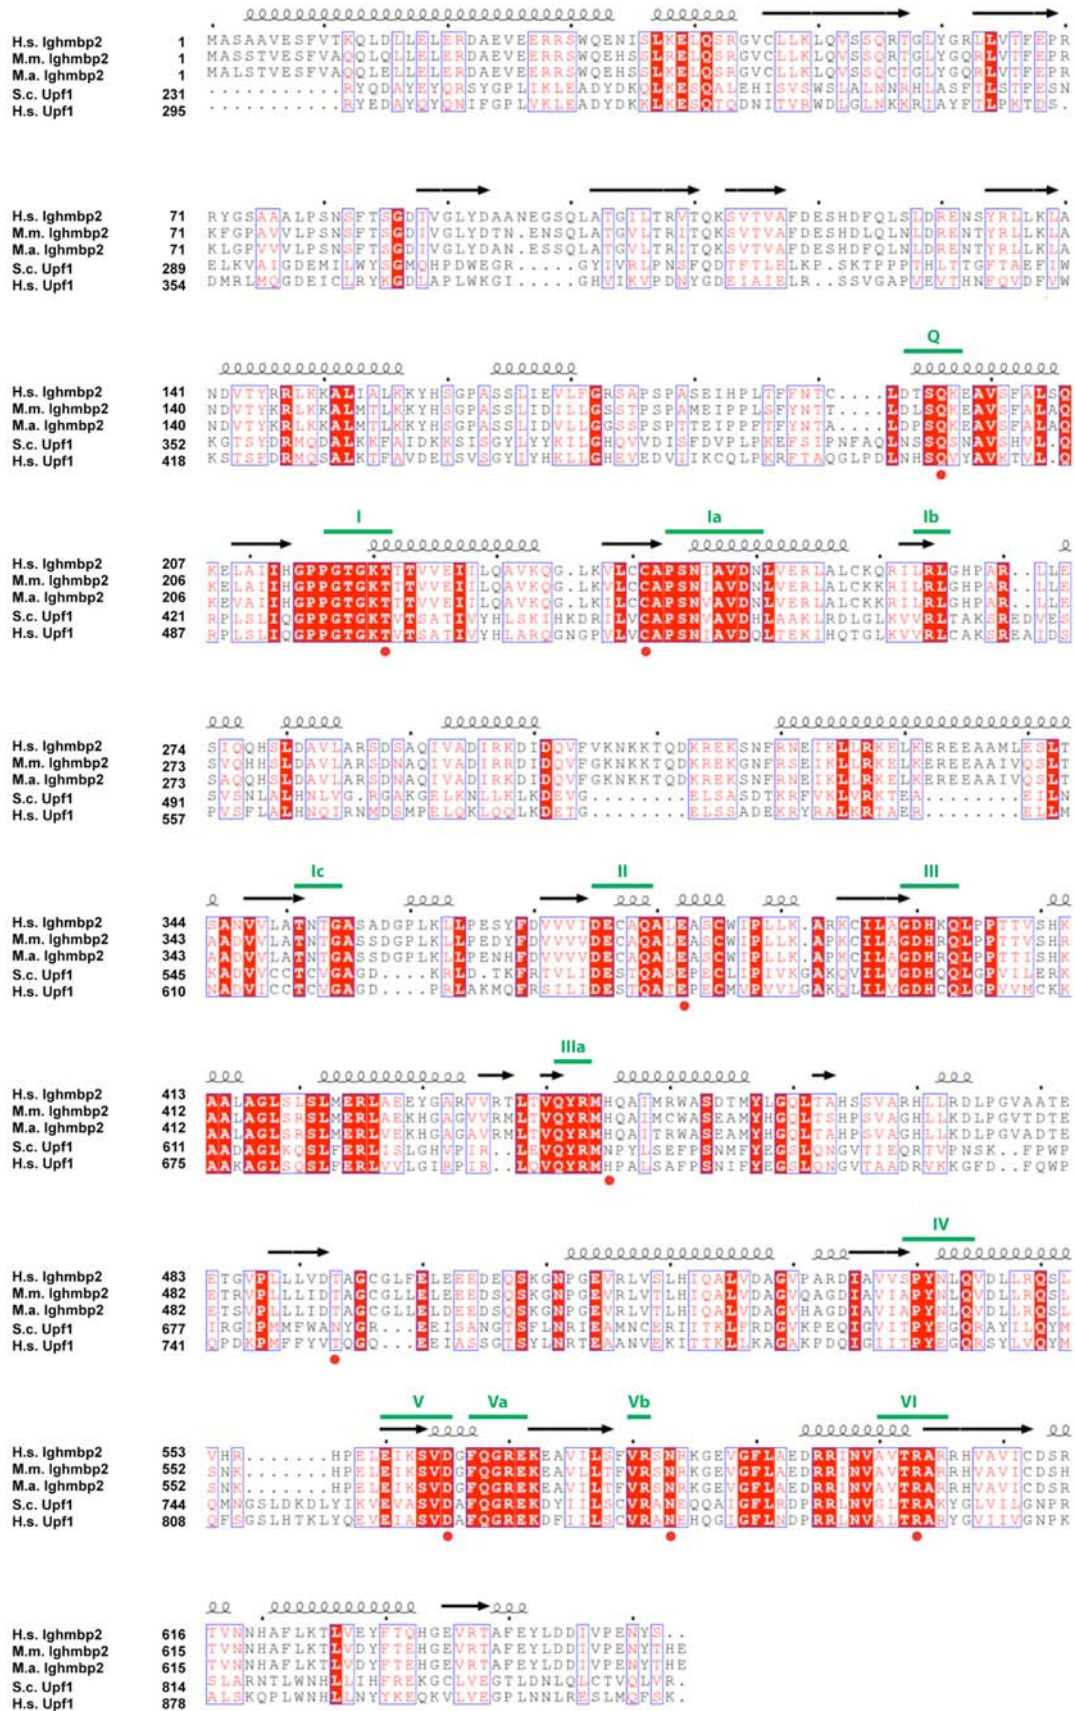

Supplement: supp_gks792_nar-01615-h-2012-File008.pdf [file supp_gks792_nar-01615-h-2012-File008.pdf]
